# Supplementary material
Source: PubMed Central journal article supplement (PMC3569598)
Supplement: 97320630009121S1.pdf [file 97320630009121S1.pdf]

## Supplementary material:

**Table 1:** HBVrt amino acid residues involved in the H-bond interaction with adefovir

| Protein                  | Interacting Residues | H-Donors   | H-Acceptors | Binding Energy (kcal/mol) | VdW+Electrostatic energy+hbond (kcal/mol) |
|--------------------------|----------------------|------------|-------------|---------------------------|-------------------------------------------|
| HBVrt wild type (rtI233) | Asp83 (2.904 Å)      | UNK`1/O30  | Asp83/OD2   | -5.97                     | -9.35                                     |
|                          | Asp205 (2.792 Å)     | MG`601/Mg  | Asp205/OD2  |                           |                                           |
|                          | Mg (2.053 Å)         | MG`600/Mg  | UNK1/O6     |                           |                                           |
|                          | Arg41 (2.797 Å)      | Arg41/2HH1 | UNK1/O6     |                           |                                           |
|                          | Arg41 (2.888 Å)      | UNK`1/O11  | Asn33/OD1   |                           |                                           |
| HBVrt mutant (rtI233V)   | Asn33 (2.876 Å)      | Arg41/NH2  | UNK1/O11    | -5.19                     | -9.14                                     |
|                          | Lys32 (2.787 Å)      | Lys32/NZ   | UNK1/O6     |                           |                                           |
|                          | Mg (2.259 Å)         | MG`600/Mg  | UNK1/O7     |                           |                                           |
|                          | Arg41 (2.580 Å)      | Arg41/2HH2 | UNK1/O7     |                           |                                           |
|                          | Arg41 (2.888 Å)      | Arg41/NH1  | UNK1/O7     |                           |                                           |
